# Supplementary material for: Quantitative Analysis of Immune Infiltrates in Primary Melanoma
Source: Oxford University Press journal article supplement (doi:10.1158/2326-6066.cir-17-0360), 2018-02-21
Supplement: 23266066cir170360-sup-186260_3_supp_4557326_p3ck7h.docx [file 23266066cir170360-sup-186260_3_supp_4557326_p3ck7h.docx]

| **Supplemental Table S2:**  **Melanoma Patient Characteristics for Unanalyzable Patient Cohort (n=42)** | | |
| --- | --- | --- |
| **Clinical Characteristics** | |  |
| Gender | |  |
|  | Male, no. (%) | 33 (78.6) |
|  | Female, no. (%) | 9 (21.4) |
| Age | |  |
|  | Median, no. (range) | 74.5 (34-97) |
| Location of Tumor | |  |
|  | Trunk, no. (%) | 14 (33.3) |
|  | Extremity, no. (%) | 28 (66.7) |
|  | Unknown, no (%) | 0 (0) |
| Stage | |  |
|  | II, no. (%) | 37 (88.1) |
|  | III, no. (%) | 5 (11.9) |
| **Pathological Characteristics** | |  |
| Depth (mm) | |  |
|  | Median, no. (range) | 2.75 (0.32-26) |
| Ulceration | |  |
|  | Absent, no. (%) | 18 (42.8) |
|  | Present, no. (%) | 22 (52.4) |
|  | Unknown, no. (%) | 2 (4.8) |
| **Outcome Characteristics** | |  |
| Patient Follow-Up (months) | |  |
|  | Median, no. (range) | 36.5 (3-171) |
| OS (months) | |  |
|  | Alive (at least 2 years), no. (%) | 12 (29.3) |
|  | Dead, no. (%) | 29 (70.7) |
| DSS (months) | |  |
|  | Alive or NED at Death, no. (%) | 13 (30.9) |
|  | Dead with melanoma, no. (%) | 6 (14.3) |
|  | Unknown, no (%) | 23 (54.8) |
| (OS = Overall Survival, DSS = Disease Specific Survival, NED = No Evidence of Disease) | | |
