# Supplementary material for: Quantitative Analysis of Immune Infiltrates in Primary Melanoma
Source: Oxford University Press journal article supplement (doi:10.1158/2326-6066.cir-17-0360), 2018-02-21
Supplement: 23266066cir170360-sup-186260_3_supp_4557331_p3kk7h.docx [file 23266066cir170360-sup-186260_3_supp_4557331_p3kk7h.docx]

| **Supplemental Table S2:**  **Melanoma Patient Characteristics for DSS Cohort (n=64)** | | |
| --- | --- | --- |
| **Clinical Characteristics** | |  |
| Gender | |  |
|  | Male, no. (%) | 50 (78.1) |
|  | Female, no. (%) | 14 (21.9) |
| Age | |  |
|  | Median, no. (range) | 68 (22-96) |
| Location of Tumor | |  |
|  | Trunk, no. (%) | 37 (57.8) |
|  | Extremity, no. (%) | 26 (40.6) |
|  | Unknown, no (%) | 1 (1.6) |
| Stage | |  |
|  | II, no. (%) | 51 (79.7) |
|  | III, no. (%) | 13 (20.3) |
| **Pathological Characteristics** | |  |
| Depth (mm) | |  |
|  | Median, no. (range) | 2.6 (0.7-11.4) |
| Ulceration | |  |
|  | Absent, no. (%) | 24 (37.5) |
|  | Present, no. (%) | 37 (57.8) |
|  | Unknown, no. (%) | 3 (4.7) |
| TILs |  |  |
|  | Absent, no. (%) | 1 (1.6) |
|  | Non-Brisk, no. (%) | 41 (64.1) |
|  | Brisk, no. (%) | 18 (28.1) |
|  | Unknown, no. (%) | 4 (6.2) |
| **Outcome Characteristics** | |  |
| Patient Follow-Up (months) | |  |
|  | Median, no. (range) | 53 (5-173) |
| OS (months) | |  |
|  | Alive (at least 2 years), no. (%) | 31 (48.4) |
|  | Dead, no. (%) | 33 (51.6) |
| DSS (months) | |  |
|  | Alive or NED at death, no. (%) | 42 (65.6) |
|  | Dead with melanoma, no. (%) | 22 (34.4) |
|  | Unknown, no (%) | 0 (0) |
| (TILs = Tumor Infiltrating Lymphocytes, OS = Overall Survival, DSS = Disease Specific Survival, NED = No Evidence of Disease) | | |
