# Supplementary material for: Quantitative Analysis of Immune Infiltrates in Primary Melanoma
Source: Oxford University Press journal article supplement (doi:10.1158/2326-6066.cir-17-0360), 2018-02-21
Supplement: 23266066cir170360-sup-186260_3_supp_4557336_p3fk7h.docx [file 23266066cir170360-sup-186260_3_supp_4557336_p3fk7h.docx]

| **Receiver Operating Characteristic Curve** | | | | | | |
| --- | --- | --- | --- | --- | --- | --- |
| **Variable** | **Binary** | **AUC** | **Cutoff** | **Sens** | **Spec** | **p** |
| **CD3+CD8+ Stroma** | Low vs High | 0.668 | 0.042 | 0.545 | 0.762 | 0.021 |
| **CD3+CD8+ Tumor** | Low vs High | 0.662 | 0.005 | 0.636 | 0.714 | 0.033 |
| **CD8 distance to CD68+HLA-DR-** | Close vs Far | 0.682 | 165.540 | 0.550 | 0.805 | 0.011 |
| **CD68+ Stroma** | High vs Low | 0.611 | 0.087 | 0.409 | 0.833 | 0.149 |
| **CD68+ Tumor** | High vs Low | 0.616 | 0.003 | 0.909 | 0.333 | 0.094 |
| **Univariable Cox Proportional Hazards Model** | | | | | | |
| **Variable** | **Binary** | **Value** | **x2** | **p** | **HR** | **95% CI** |
| **CD3+CD8+ Stroma** | Low vs High | 0.964 | 5.018 | 0.025 | 2.621 | 1.128 - 6.091 |
| **CD3+CD8+ Tumor** | Low vs High | 1.038 | 5.440 | 0.020 | 2.822 | 1.180 - 6.749 |
| **CD8 distance to CD68+HLA-DR-** | Close vs Far | 1.139 | 6.386 | 0.012 | 3.122 | 1.291 - 7.551 |
| **CD68+ Stroma** | High vs Low | 1.093 | 6.306 | 0.012 | 2.985 | 1.271 - 7.007 |
| **CD68+ Tumor** | High vs Low | 1.000 | 2.580 | 0.108 | 2.718 | 0.802 - 9.209 |
