# Supplementary material for: Quantitative Analysis of Immune Infiltrates in Primary Melanoma
Source: Oxford University Press journal article supplement (doi:10.1158/2326-6066.cir-17-0360), 2018-02-21
Supplement: 23266066cir170360-sup-186260_3_supp_4557348_p3bk7h.docx [file 23266066cir170360-sup-186260_3_supp_4557348_p3bk7h.docx]

| **Pearson Correlation Matrix** | | | | | | | |
| --- | --- | --- | --- | --- | --- | --- | --- |
| **Variables** | **CD8/ CD68 Stroma** | **CD3+CD8+ Total** | **CD3+CD8+ Tumor** | **CD3+CD8+ Stroma** | **CD68+ Total** | **CD68+ Tumor** | **CD68+ Stroma** |
| **CD8/ CD68 Stroma** | **1** | **0.472** | **0.535** | **0.549** | **0.443** | **0.328** | **0.596** |
| **CD3+CD8+ Total** | **0.472** | **1** | **0.586** | **0.680** | 0.007 | -0.100 | 0.181 |
| **CD3+CD8+ Tumor** | **0.535** | **0.586** | **1** | **0.607** | 0.136 | 0.022 | 0.110 |
| **CD3+CD8+ Stroma** | **0.549** | **0.680** | **0.607** | **1** | 0.125 | 0.014 | 0.190 |
| **CD68+ Total** | **0.443** | 0.007 | 0.136 | 0.125 | **1** | **0.316** | **0.695** |
| **CD68+ Tumor** | **0.328** | -0.100 | 0.022 | 0.014 | **0.316** | **1** | **0.361** |
| **CD68+ Stroma** | **0.596** | 0.181 | 0.110 | 0.190 | **0.695** | **0.361** | **1** |
| **p Values for Above Correlation** | | | | | | | |
| **Variables** | **CD8/ CD68 Stroma** | **CD3+CD8+ Total** | **CD3+CD8+ Tumor** | **CD3+CD8+ Stroma** | **CD68+ Total** | **CD68+ Tumor** | **CD68+ Stroma** |
| **CD8/ CD68 Stroma** | **0** | **0.000** | **0.000** | **0.000** | **0.000** | **0.008** | **0.000** |
| **CD3+CD8+ Total** | **< 0.0001** | **0** | **< 0.0001** | **< 0.0001** | 0.954 | 0.431 | 0.153 |
| **CD3+CD8+ Tumor** | **< 0.0001** | **< 0.0001** | **0** | **< 0.0001** | 0.284 | 0.862 | 0.386 |
| **CD3+CD8+ Stroma** | **< 0.0001** | **< 0.0001** | **< 0.0001** | **0** | 0.324 | 0.914 | 0.133 |
| **CD68+ Total** | **0.000** | 0.954 | 0.284 | 0.324 | **0** | **0.011** | **< 0.0001** |
| **CD68+ Tumor** | **0.008** | 0.431 | 0.862 | 0.914 | **0.011** | **0** | **0.003** |
| **CD68+ Stroma** | **< 0.0001** | 0.153 | 0.386 | 0.133 | **< 0.0001** | **0.003** | **0** |
